# Supplementary material
Source: Springer Nature journal article supplement (https://www.springermedizin.de/resource/supplementary/12990_2009_242_MOESM1_ESM.pdf/9612866)

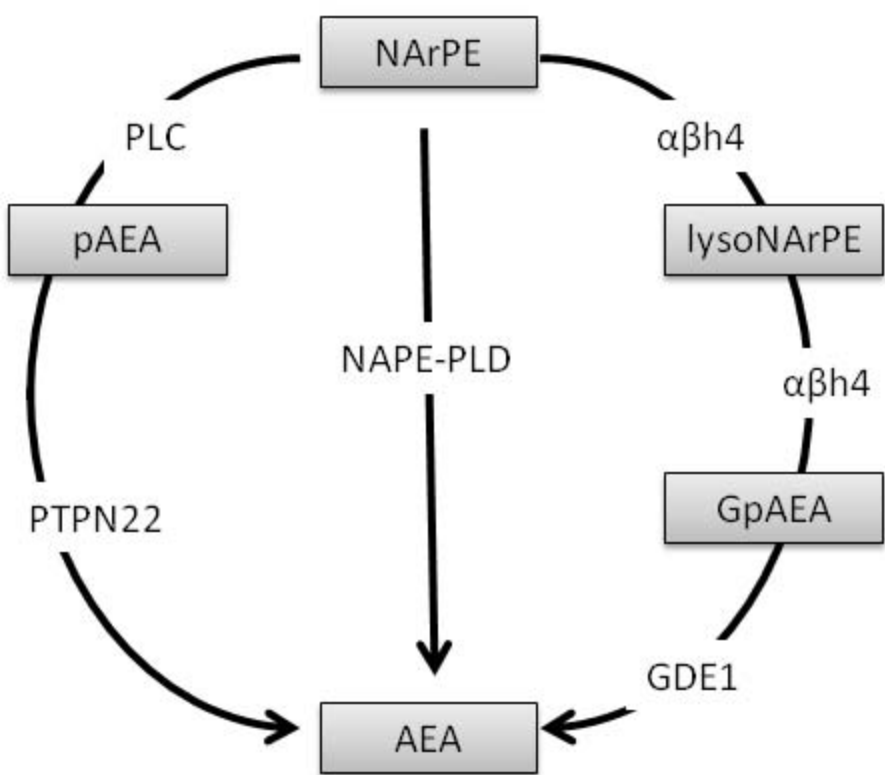

Supplement: MOESM1 [file 9612866]
